# Supplementary material for: Clove extract functions as a natural fatty acid synthesis inhibitor and prevents obesity in a mouse model
Source: Royal Society of Chemistry journal article supplement (doi:10.1039/c7fo00096k), 2017-01-01
Supplement: c7fo00096k1.pdf [file c7fo00096k1.pdf]

## Supplementary materials

**Figure 1.** Food consumption of mice.

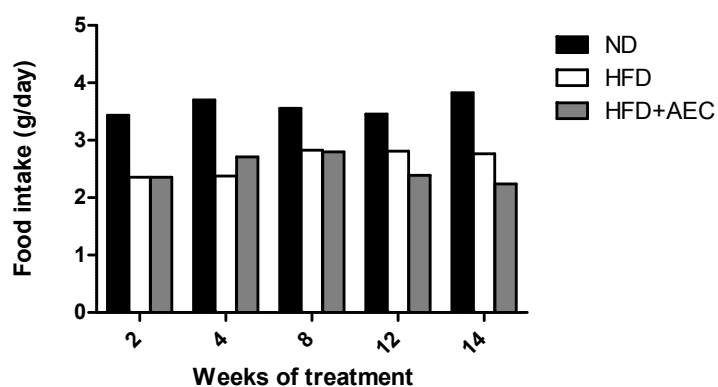

**Table 1.** Abbreviation list.

| Abbreviation | Full name                            |
|--------------|--------------------------------------|
| FASN         | Fatty acid synthase                  |
| AEC          | Alcohol extract of clove             |
| ND           | Normal diet                          |
| HFD          | High-fat diet                        |
| TC           | Total cholesterol                    |
| TG           | Total triglyceride                   |
| LDL-C        | Low density lipoprotein-cholesterol  |
| HDL-C        | High density lipoprotein-cholesterol |
| H&E          | Hematoxylin and eosin                |
| RSG          | Rosiglitazone                        |
